# Supplementary material for: Linking statistical shape models and simulated function in the healthy adult human heart
Source: PubMed Central journal article supplement (PMC8049237; doi:10.1371/journal.pcbi.1008851), 2021-04-15
Supplement: pcbi.1008851.s002.pdf [file pcbi.1008851.s002.pdf]

## S2 Universal Ventricular Coordinates

We calculated UVC on the CT and synthetic cohorts, following the approach presented in [1]. The UVC consist of four different numbers for each point in the ventricular myocardium:  $\rho$ , corresponding to the transmural coordinate, with  $\rho = 0$  at the endocardium and  $\rho = 1$  at the epicardium;  $\phi$ , corresponding to the rotational coordinate, with  $\phi = \pm\pi$  at the LV free wall, negative values in the posterior part of the heart and positive values in the anterior part of the heart;  $Z$ , corresponding to the apicobasal coordinate, with  $Z = 0$  at the apical junction of the ventricles and  $Z = 1$  at the base of the heart; and  $V$ , corresponding to the transventricular coordinate, with  $V = -1$  if the point belongs to the LV, and  $V = 1$  if it belongs to the RV. An example of the UVC is shown in Fig A.

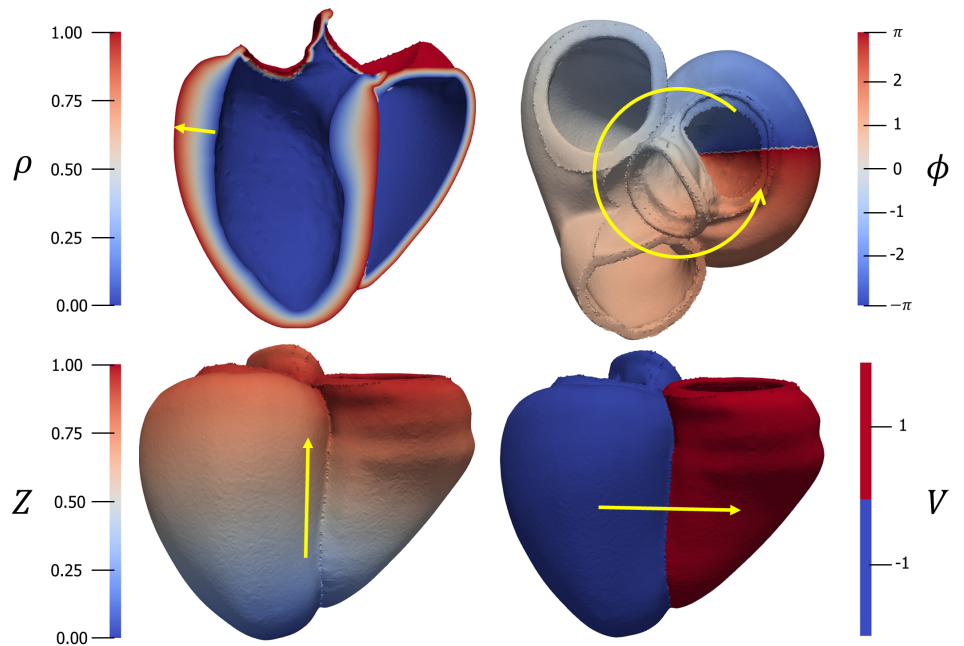

**Fig A.** Visualisation of the UVC in a single mesh. All coordinates are continuous except for  $V$  which takes two discrete values. The yellow arrows indicate the increasing value of the coordinate.  $\rho$  corresponds to the transmural coordinate,  $\phi$  to the rotational coordinate,  $Z$  to the apicobasal coordinate and  $V$  to the transventricular coordinate.

## References

1. Bayer J, Prassl AJ, Pashaei A, Gomez JF, Frontera A, Neic A, et al. Universal ventricular coordinates: A generic framework for describing position within the heart and transferring data. *Medical Image Analysis*. 2018;45:83–93. doi:10.1016/j.media.2018.01.005.
