# Supplementary material for: Linking statistical shape models and simulated function in the healthy adult human heart
Source: PubMed Central journal article supplement (PMC8049237; doi:10.1371/journal.pcbi.1008851), 2021-04-15
Supplement: pcbi.1008851.s004.pdf [file pcbi.1008851.s004.pdf]

## S4 Details on the electro-mechanical simulations

For the electro-mechanical simulations we followed a similar pipeline as in [1]. We ran EP simulations with the reaction-eikonal model [2], in which the depolarisation is ruled by the eikonal equation:

$$\|\nabla t_a\|_{\mathbf{V}} = 1, \quad (1)$$

where  $t_a$  is the wavefront arrival time and  $\mathbf{V}$  is the (symmetric positive definite) tensor containing the squared wave velocities associated to the fibre ( $\mathbf{f}_0$ ), sheet ( $\mathbf{f}_0$ ) and sheet normal ( $\mathbf{n}_0$ ) directions.

As an initial condition, we stimulated points in the endocardium of the mesh, using the UVC. We set the constraint on parameter  $Z \leq 0.33$ , to limit the stimulation to the bottom part of the ventricles simulating the outbreak of the His-Purkinje network terminals. To simulate the early endocardial activation [3], a fast endocardial conduction (FEC) layer was labelled in the meshes, where we set up a higher conduction velocity. The layer covered the 70% of the bottom apicobasal length ( $Z \leq 0.7$  in UVC) and is 1 element thick in the endocardium. These parameters are related to the most dense part of the Purkinje network [4]. The only conductive tissue was the ventricular myocardium - activation was not simulated in the atria. See table A for the values of all the EP parameters. Details on the solver and numerical scheme for the EP have been published previously elsewhere [2]. The solver has also been validated in  $N$ -version benchmark studies [5].

| Parameter                | Value (reference) |
|--------------------------|-------------------|
| CV (fibre)               | 0.8 m/s [6]       |
| CV (transfibre)          | 0.23 m/s [7]      |
| CV (FEC)                 | 5.6 m/s [8]       |
| Depolarisation threshold | -60 mV [9]        |

**Table A.** Parameter values for the reaction-eikonal model (used only in the ventricles). CV stands for conduction velocity and FEC for fast endocardial conduction layer.

We simulated the large deformation mechanics in a Lagrangian reference system [10]. To simulate stresses in the reference configuration we used the model

$$\mathbf{S}_{\text{pas}} = 2 \frac{\partial \Psi(\mathbf{C})}{\partial \mathbf{C}} \quad (2)$$

where  $\mathbf{S}_{\text{pas}}$  is the passive component of the second Piola-Kirchhoff stress tensor and  $\mathbf{C}$  is the right Cauchy-Green deformation tensor.

The ventricular myocardium was modelled as a hyperelastic transversely isotropic material with Guccione's strain energy function [11]:

$$\Psi(\mathbf{C}) = \frac{\kappa}{2} (\ln J)^2 + \frac{a}{2} (e^Q - 1), \quad (3)$$

$$Q = b_f E_{ff}^2 + b_t (E_{ss}^2 + E_{nn}^2 + 2E_{sn}^2) + 2b_{fs} (E_{fs}^2 + E_{fn}^2), \quad (4)$$

with

$$E_{ij} = \mathbf{i}_0 \cdot \bar{\mathbf{E}} \mathbf{j}_0, \quad (5)$$

$$\bar{\mathbf{E}} = \frac{1}{2} (\bar{\mathbf{C}} - \mathbf{I}), \quad (6)$$

$$\bar{\mathbf{C}} = J^{-2/3} \mathbf{C} \quad (7)$$

being  $\bar{\mathbf{E}}$  the modified isochoric Green-Lagrange strain tensor and  $J$  the determinant of the Jacobian matrix of the deformation gradient tensor, for  $\mathbf{i}, \mathbf{j} = \mathbf{f}, \mathbf{s}, \mathbf{n}$ . See table B for the values of the parameters of this constitutive law.

| Parameter | Value    |
|-----------|----------|
| $a$       | 1.7 kPa  |
| $b_f$     | 8        |
| $b_{fs}$  | 4        |
| $b_t$     | 3        |
| $\kappa$  | 1000 kPa |

**Table B.** Parameter values for the Guccione’s law in the ventricle, extracted from [12].

The remaining tissues were modelled as non-contracting neo-Hookean materials [13] following the strain energy function [1]:

$$\Psi(\mathbf{C}) = \frac{\kappa}{2}(J - 1)^2 + \frac{c}{2}(\text{tr}(\bar{\mathbf{C}}) - 3), \quad (8)$$

where  $\text{tr}$  is the trace and  $c$  and  $\kappa$  the material parameters. The values of  $\kappa$  and  $c$  for the valves was set to 1000 kPa (as an arbitrary high value) to enforce material incompressibility. See table C for the values of all the parameters of this constitutive law.

| Parameter           | Value [reference] |
|---------------------|-------------------|
| $\kappa$            | 1000 kPa          |
| $c_{\text{atria}}$  | 7.45 kPa [14]*    |
| $c_{\text{veins}}$  | 7.45 kPa [14]*    |
| $c_{\text{aorta}}$  | 26.66 kPa [15]*   |
| $c_{\text{PA}}$     | 3.7 kPa [16]*     |
| $c_{\text{valves}}$ | 1000 kPa          |

**Table C.** Parameter values for the Neo-Hookean material model used in the atria and veins. \* extracted as average values of the reference cited.

To simulate the active stress of the ventricles triggered by electrical activation, we used the phenomenological activation-based Tanh Stress model [17, 18]. See table D for the values of the parameters of this constitutive law. Details on the solver and numerical scheme for the EM have been published previously elsewhere [19]. The solver has also been validated in  $N$ -version benchmark studies [20].

| Parameter                 | Value)  |
|---------------------------|---------|
| EM delay                  | 20 ms   |
| Peak isometric tension    | 120 kPa |
| Time constant relaxation  | 50 ms   |
| Time constant contraction | 50 ms   |
| Duration of transient     | 550 ms  |

**Table D.** Parameter values for the Tanh stress active tension model (only applied to the ventricles). All the values were hand-tuned.

The preload of the ventricles was modelled via constant atrial pressures, while the afterload was modelled with two three-element Windkessel models, one for the systemic circulation and one for the pulmonary circulation [21]. For the values of the initial pressures see table E.

| Parameter                 | Value (reference) |
|---------------------------|-------------------|
| LV endocardial pressure   | 1.6 kPa [22]      |
| RV endocardial pressure   | 0.8 kPa [23]      |
| Aortic pressure           | 77 mmHg [24]      |
| Pulmonary artery pressure | 17.4 mmHg [25]    |

**Table E.** Parameter values for initial pressures.

The value of the backward resistances for all the valves were set to either 1000 or 10000 mmHg/mL/s as arbitrary high values to avoid backflow or regurgitation. The forward resistances of the valves have been set to 0 mmHg/mL/s for the aorta and pulmonary artery to achieve numerical convergence and an EF in a healthy range. In the case of the mitral and tricuspid valves, a value of 0.05 mmHg/mL/s was set to allow for physiological filling. Similar values were also used in [26].

| Parameter                                     | Value [reference]     |
|-----------------------------------------------|-----------------------|
| Aortic valve: serial resistor                 | 0.03 mmHg s/mL [27]   |
| Aortic valve: parallel resistor               | 0.63 mmHg s/mL [27]   |
| Aortic valve: capacitor                       | 5.16 mL/mmHg [27]     |
| Mitral valve peak forward flow resistance     | 0.05 mmHg/mL/s        |
| Mitral valve peak backward flow resistance    | 1000 mmHg/mL/s        |
| Aortic valve peak forward flow resistance     | 0 mmHg/mL/s           |
| Aortic valve peak backward flow resistance    | 10000 mmHg/mL/s       |
| Pulmonary valve: serial resistor              | 0.015 mmHg s/mL [28]  |
| Pulmonary valve: parallel resistor            | 0.1008 mmHg s/mL [28] |
| Pulmonary valve: capacitor                    | 21.156 mL/mmHg [28]   |
| Tricuspid valve peak forward flow resistance  | 0.05 mmHg/mL/s        |
| Tricuspid valve peak backward flow resistance | 1000 mmHg/mL/s        |
| Pulmonary valve peak forward resistance       | 0 mmHg/mL/s           |
| Pulmonary valve peak backward resistance      | 10000 mmHg/mL/s       |

**Table F.** Parameter values for the 3-elements Windkessel model used for the circulatory system (and valves).

The right pulmonary veins and the superior vena cava were assigned omni-directional spring boundary conditions, to allow spring-like motion within them [29,30]. To achieve a physiologically plausible motion with downward motion of the atrioventricular plane and limited motion of the apex, we simulated the pericardium applying springs (Robin boundary conditions) normally to the epicardial surface [26].

## References

1. Marx L, Gsell MA, Rund A, Caforio F, Prassl AJ, Toth-Gayor G, et al. Personalization of electro-mechanical models of the pressure-overloaded left ventricle: fitting of Windkessel-type afterload models. *Philosophical Transactions of the Royal Society A*. 2020;378(2173):20190342.
2. Neic A, Campos FO, Prassl AJ, Niederer SA, Bishop MJ, Vigmond EJ, et al. Efficient computation of electrograms and ECGs in human whole heart simulations using a reaction-eikonal model. *Journal of Computational Physics*. 2017;346:191–211. doi:10.1016/J.JCP.2017.06.020.
3. Hyde ER, Behar JM, Claridge S, Jackson T, Lee AWC, Remme EW, et al. Beneficial Effect on Cardiac Resynchronization From Left Ventricular

- Endocardial Pacing Is Mediated by Early Access to High Conduction Velocity Tissue. *Circulation: Arrhythmia and Electrophysiology*. 2015;8(5):1164–1172. doi:10.1161/CIRCEP.115.002677.
4. Vigmond EJ, Clements C. Construction of a Computer Model to Investigate Sawtooth Effects in the Purkinje System. *IEEE Transactions on Biomedical Engineering*. 2007;54(3):389–399. doi:10.1109/TBME.2006.888817.
  5. Niederer SA, Kerfoot E, Benson AP, Bernabeu MO, Bernus O, Bradley C, et al. Verification of cardiac tissue electrophysiology simulators using an N-version benchmark. *Philosophical Transactions of the Royal Society A: Mathematical, Physical and Engineering Sciences*. 2011;369(1954):4331–4351.
  6. Nanthakumar K, Jalife J, Massé S, Downar E, Pop M, Asta J, et al. Optical mapping of Langendorff-perfused human hearts: establishing a model for the study of ventricular fibrillation in humans. *American Journal of Physiology-Heart and Circulatory Physiology*. 2007;293(1):H875–H880.
  7. Roberts DE, Hersh LT, Scher AM. Influence of cardiac fiber orientation on wavefront voltage, conduction velocity, and tissue resistivity in the dog. *Circulation research*. 1979;44(5):701–712.
  8. Lee AW. A rule-based method for predicting the electrical activation of the heart with cardiac resynchronization therapy from non-invasive clinical data. *Medical Image Analysis*. 2019;.
  9. Nerbonne JM, Kass RS. Molecular Physiology of Cardiac Repolarization. *Physiological Reviews*. 2005;85(4):1205–1253. doi:10.1152/physrev.00002.2005.
  10. Nordsletten DA, Niederer SA, Nash MP, Hunter PJ, Smith NP. Coupling multi-physics models to cardiac mechanics. *Progress in Biophysics and Molecular Biology*. 2011;104(1-3):77–88. doi:10.1016/J.PBIOMOLBIO.2009.11.001.
  11. Guccione JM, McCulloch AD, Waldman LK. Passive material properties of intact ventricular myocardium determined from a cylindrical model. *Journal of biomechanical engineering*. 1991;113(1):42–55.
  12. Nasopoulou A, Shetty A, Lee J, Nordsletten D, Aldo Rinaldi C, Lamata P, et al. Improved identifiability of myocardial material parameters by an energy-based cost function. *Biomech Model Mechanobiol*. 2017;16:971–988. doi:10.1007/s10237-016-0865-3.
  13. Rivlin RS. Large Elastic Deformations of Isotropic Materials. IV. Further Developments of the General Theory. *Philosophical Transactions of the Royal Society A: Mathematical, Physical and Engineering Sciences*. 1948;241(835):379–397. doi:10.1098/rsta.1948.0024.
  14. Di Martino ES, Bellini C, Schwartzman DS. In vivo porcine left atrial wall stress: computational model. *Journal of biomechanics*. 2011;44(15):2589–2594.
  15. Horný L, Žitný R, Chlup H, Macková H. Identification of the material parameters of an aortic wall; 2006. 8. Available from: <https://pdfs.semanticscholar.org/81ae/374f9c206aead1957fb7497b34b419856a6d.pdf>.
  16. Tian L, Wang Z, Liu Y, Eickhoff JC, Eliceiri KW, Chesler NC. Validation of an arterial constitutive model accounting for collagen content and crosslinking. *Acta Biomaterialia*. 2016;31:276–287. doi:10.1016/J.ACTBIO.2015.11.058.

17. Niederer SA, Plank G, Chinchapatnam P, Ginks M, Lamata P, Rhode KS, et al. Length-dependent tension in the failing heart and the efficacy of cardiac resynchronization therapy. *Cardiovascular Research*. 2011;89(2):336–343. doi:10.1093/cvr/cvq318.
18. Crozier A, Augustin CM, Neic A, Prassl AJ, Holler M, Fastl TE, et al. Image-Based Personalization of Cardiac Anatomy for Coupled Electromechanical Modeling. *Annals of biomedical engineering*. 2016;44(1):58–70. doi:10.1007/s10439-015-1474-5.
19. Augustin CM, Neic A, Liebmann M, Prassl AJ, Niederer SA, Haase G, et al. Anatomically accurate high resolution modeling of human whole heart electromechanics: A strongly scalable algebraic multigrid solver method for nonlinear deformation. *Journal of Computational Physics*. 2016;305:622–646. doi:10.1016/j.jcp.2015.10.045.
20. Land S, Gurev V, Arens S, Augustin CM, Baron L, Blake R, et al. Verification of cardiac mechanics software: benchmark problems and solutions for testing active and passive material behaviour. *Proceedings of the Royal Society A: Mathematical, Physical and Engineering Sciences*. 2015;471(2184):20150641.
21. Westerhof N, Elzinga G, Sipkema P. An artificial arterial system for pumping hearts. *Journal of applied physiology*. 1971;31(5):776–81. doi:10.1152/jappl.1971.31.5.776.
22. Seed W, Noble M, Walker J, Miller G, Pidgeon J, Redwood D, et al. Relationships between beat-to-beat interval and the strength of contraction in the healthy and diseased human heart. *Circulation*. 1984;70(5):799–805.
23. Murch SD, Gerche AL, Roberts TJ, Prior DL, MacIsaac AI, Burns AT. Abnormal right ventricular relaxation in pulmonary hypertension. *Pulmonary circulation*. 2015;5(2):370–375.
24. Pagoulatou S, Stergiopoulos N. Evolution of aortic pressure during normal ageing: A model-based study. *PloS one*. 2017;12(7).
25. Netzer NC, Strohl KP, Högel J, Gatterer H, Schilz R. Right ventricle dimensions and function in response to acute hypoxia in healthy human subjects. *Acta physiologica*. 2017;219(2):478–485.
26. Strocchi M, Gsell MA, Augustin CM, Razeghi O, Roney CH, Prassl AJ, et al. Simulating ventricular systolic motion in a four-chamber heart model with spatially varying robin boundary conditions to model the effect of the pericardium. *Journal of Biomechanics*. 2020;101:109645.
27. Fritz T, Wieners C, Seemann G, Steen H, Dössel O. Simulation of the contraction of the ventricles in a human heart model including atria and pericardium. *Biomechanics and modeling in mechanobiology*. 2014;13(3):627–641.
28. Hyde ER, Behar JM, Crozier A, Claridge S, Jackson T, Sohal M, et al. Improvement of right ventricular hemodynamics with left ventricular endocardial pacing during cardiac resynchronization therapy. *Pacing and Clinical Electrophysiology*. 2016;39(6):531–541.
29. Land S, Niederer SA. Influence of atrial contraction dynamics on cardiac function. *International Journal for Numerical Methods in Biomedical Engineering*. 2018;34(3):e2931. doi:10.1002/cnm.2931.

30. Pfaller MR, Hörmann JM, Weigl M, Nagler A, Chabiniok R, Bertoglio C, et al. The importance of the pericardium for cardiac biomechanics: From physiology to computational modeling. *Biomechanics and modeling in mechanobiology*. 2019;18(2):503–529.
